# Supplementary material
Source: PubMed Central journal article supplement (PMC2936101)
Supplement: NIHMS231175-supplement-supplement_1.pdf [file NIHMS231175-supplement-supplement_1.pdf]

**Supplementary Table.** Fifty-one pathogenic mutations in PRKAR1A that have been studied in 745 individuals enrolled in NYCP

| MUTATIONS in PRKAR1A found in Patients with CNC |                                            |
|-------------------------------------------------|--------------------------------------------|
| 1                                               | c.491_492delTG/p.Val164fsX4                |
| 2                                               | IVS7-(5_107)del 103                        |
| 3                                               | c.438A>T/p.Arg146Ser                       |
| 4                                               | c.439A>T/p.Ser147Gly                       |
| 5                                               | c.738T>G/ p.Tyr246X                        |
| 6                                               | c.82C>T/p.Gln28X                           |
| 7                                               | IVS7-1G>C or c.839-1G>C                    |
| 8                                               | c.220C>T/p.Arg74Cys                        |
| 9                                               | c.786_787GG>CT/p.Glu263X                   |
| 10                                              | c.1076_77delTTins13/p.Leu359fsPLUS62       |
| 11                                              | c.46C>T/p.Arg16X                           |
| 12                                              | IVS6del(-9>-2)                             |
| 13                                              | c.1A>G/p.Met1Val                           |
| 14                                              | c.101_105delCTATT/p.Ser34fsX9              |
| 15                                              | IVS9+3A>G or c.891+3A>G                    |
| 16                                              | IVS5+1G>A                                  |
| 17                                              | c.951delA/p.Arg317fsX13                    |
| 18                                              | c.124C>T/p.Arg42X                          |
| 19                                              | c.319G>T/p.Glu107X                         |
| 20                                              | c.286C>T/p.Arg96X                          |
| 21                                              | c.69_70duplGA/p.Lys24fsX105                |
| 22                                              | c.353_365del13/p.Ile118fsX6                |
| 23                                              | IVS2+1 G>A or C177+1G>A                    |
| 24                                              | IVS7-(2_7)del6 or c.709-7del6(TTTTTA)      |
| 25                                              | c.440 + 1G>T                               |
| 26                                              | c43_58del16/p.Leu15fs104X                  |
| 27                                              | c.528_531del4/ins11/p.Ile176delinsfsX13    |
| 28                                              | c.725dupA / p.Lys242fsX5                   |
| 29                                              | c.1055_1058del4(GACC)/p.Arg352fsX87        |
| 30                                              | IVS4+4delG or c.440+ 4delG                 |
| 31                                              | c.340delG/p.Val113fsX15                    |
| 32                                              | c.206C>T/p.Gln69X                          |
| 33                                              | c.812dupT/p.Leu271fsX6                     |
| 34                                              | c.566_567AA>CAC/p.Glu189fsX43              |
| 35                                              | c.682C>T/p.Arg228X                         |
| 36                                              | c.712insAA/p.Ser238fsX3                    |
| 37                                              | c.267delA/p.Pro89fsX39                     |
| 38                                              | IVS2-2A>G or c.175-2 A>G                   |
| 39                                              | c.693insT/p.Arg232X                        |
| 40                                              | c.187A>T/p.Lys63X                          |
| 41                                              | c.18delC/Thr6fsX122                        |
| 42                                              | c.531_(539+32)del/p.Ile177fsX12            |
| 43                                              | c.679delG/p.Asp227fsX13                    |
| 44                                              | c1067_1070delAACGinsGCCCA/p.Glu356fsPLUS45 |
| 45                                              | c1142_1145delTCTG/p.Val381fsPLUS58         |
| 46                                              | c.279_282delTAGG/p.Arg94fsX34              |
| 47                                              | c.220_21delCG/p.Arg74fsX6                  |
| 48                                              | c.547G>T/p.Asp183Tyr                       |
| 49                                              | IVS4+1insG or c.440+ 1 insG                |
| 50                                              | c.672G>A/p.Trp224X                         |
| 51                                              | IVS4+2T>C, or c.440+2 T>C                  |
